# Supplementary material for: Regulation of the bi-directional cross-talk between ovarian cancer cells and adipocytes by SPARC
Source: PubMed Central journal article supplement (PMC6542715; doi:10.1038/s41388-019-0728-3), 2019-02-14
Supplement: NIHMS1519299-supplement-1.pdf [file NIHMS1519299-supplement-1.pdf]

# Supplement Figure 1

**A**Isolation of Omenta from *SP*<sup>-/-</sup> and *SP*<sup>+/+</sup> mice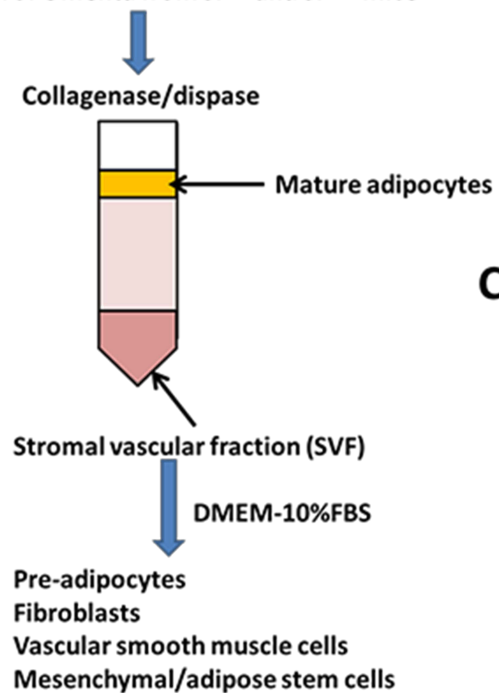**B**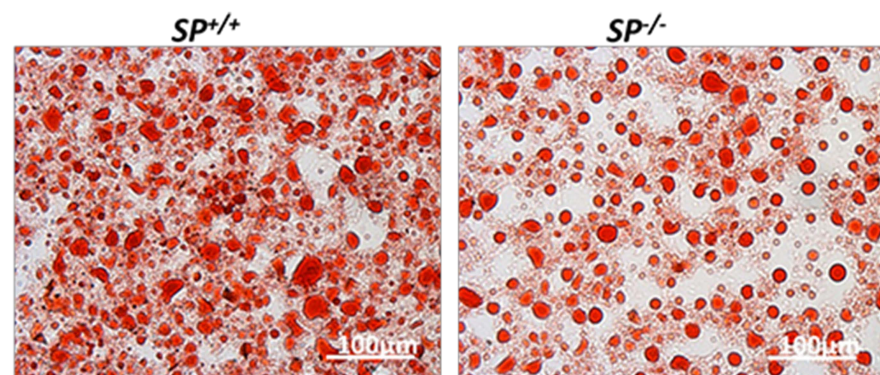**C**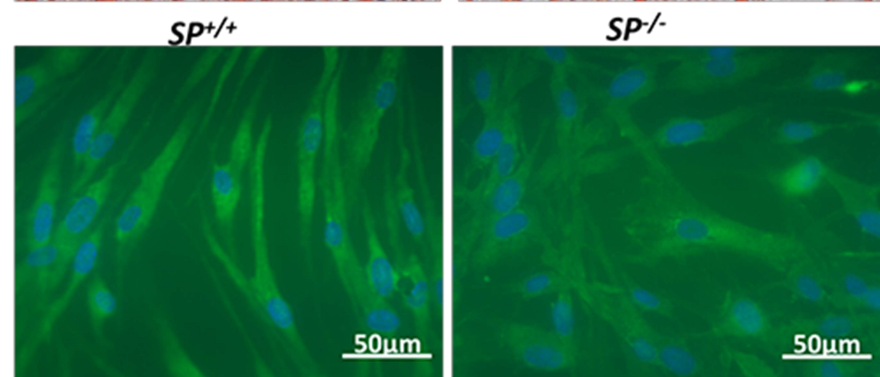**D**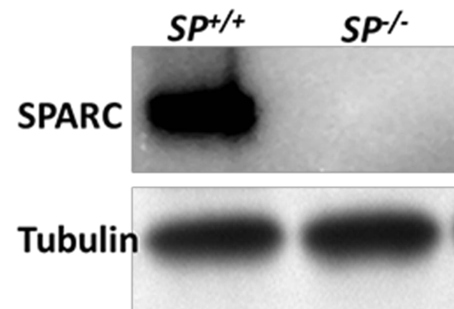**E**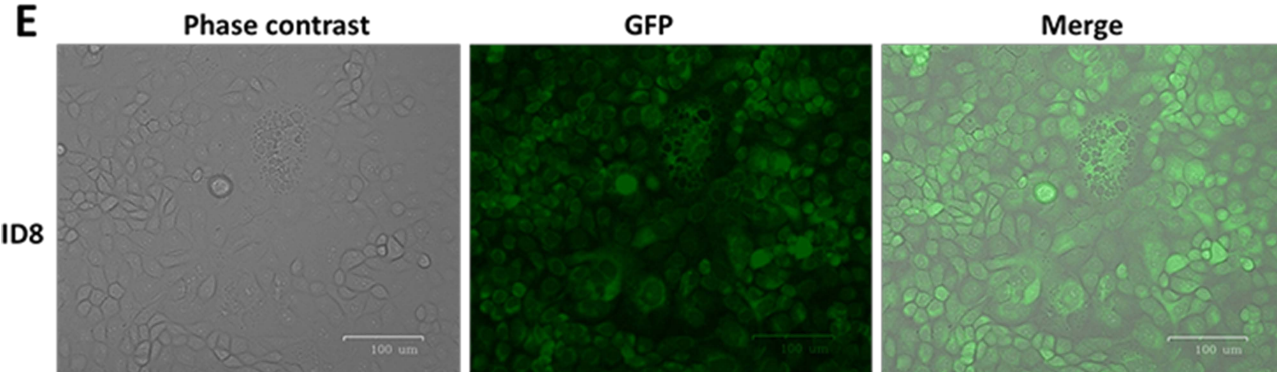**F**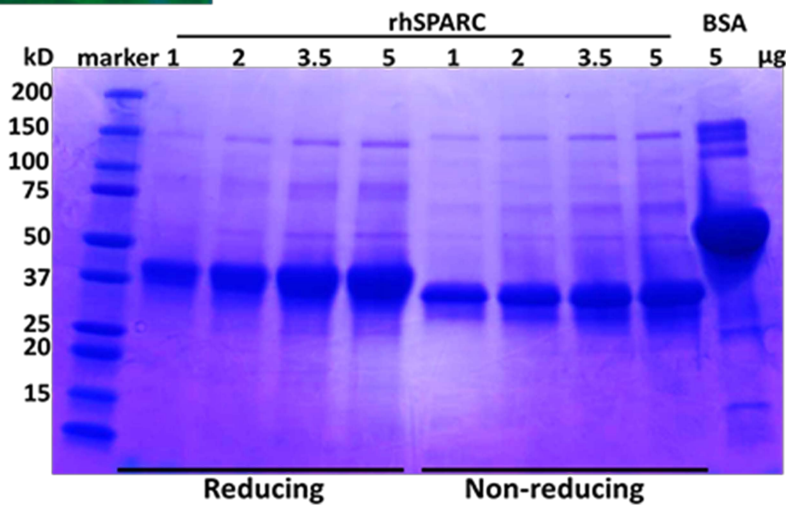

# Supplement Figure 2

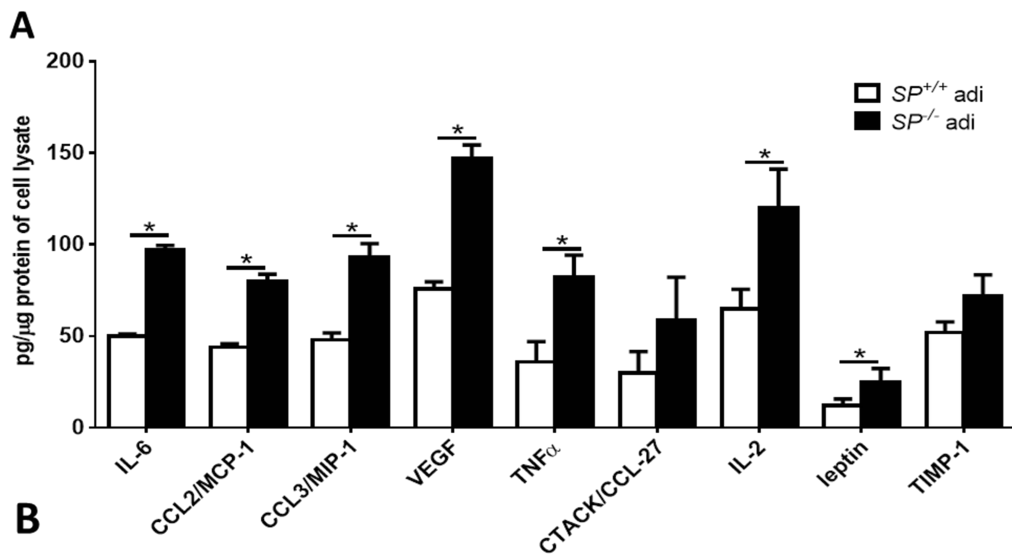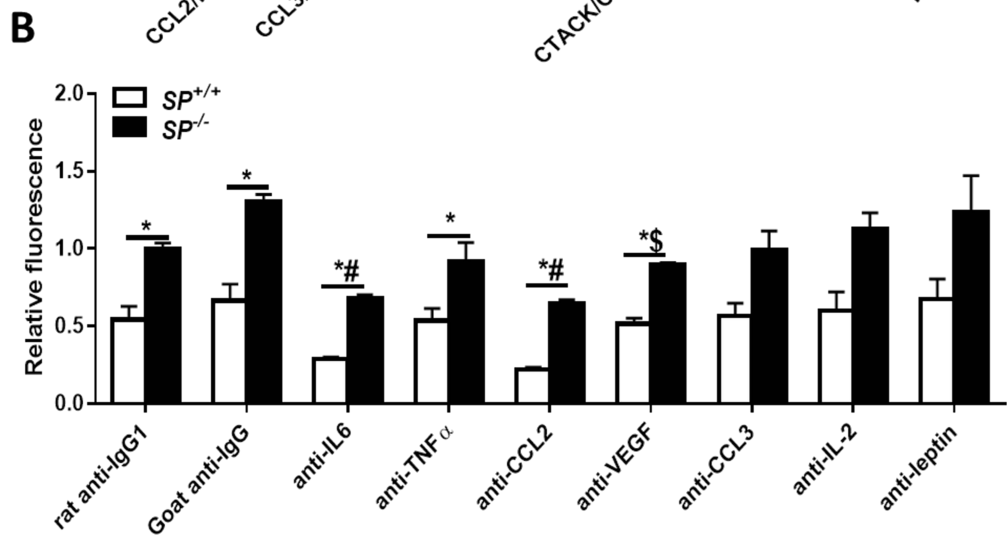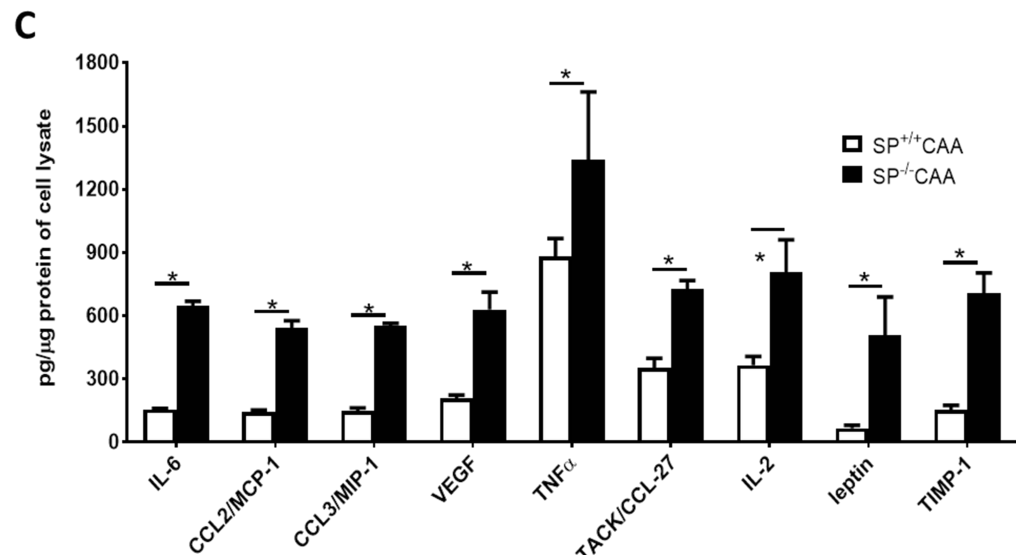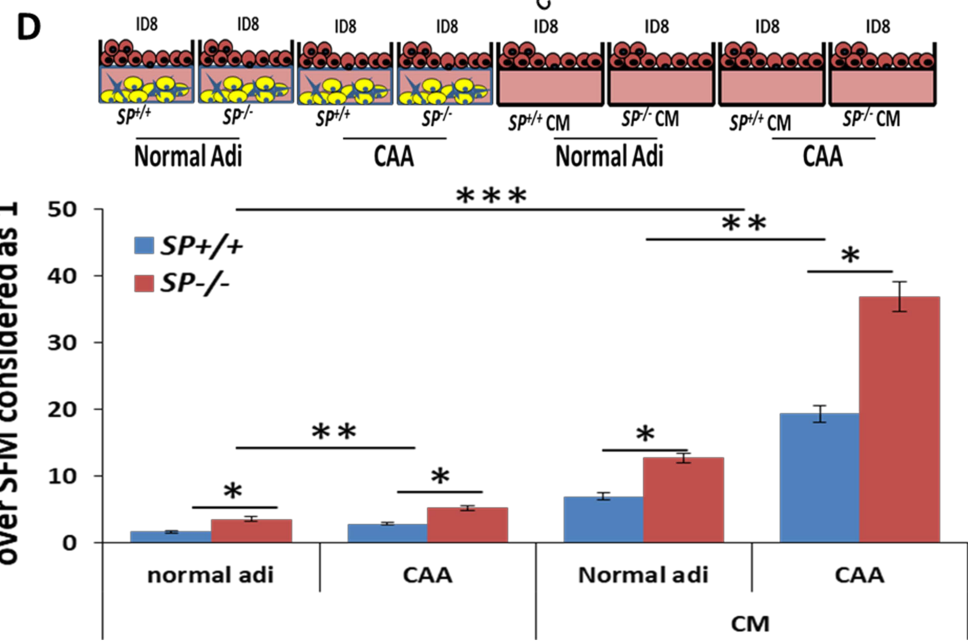

# Supplement Figure 3

SKOV3 SKOV3 SKOV3 SKOV3 SKOV3  
 OVCAR3 OVCAR3 OVCAR3 OVCAR3 OVCAR3  
 CAOV3 CAOV3 CAOV3 CAOV3 CAOV3

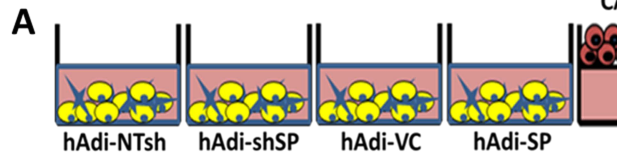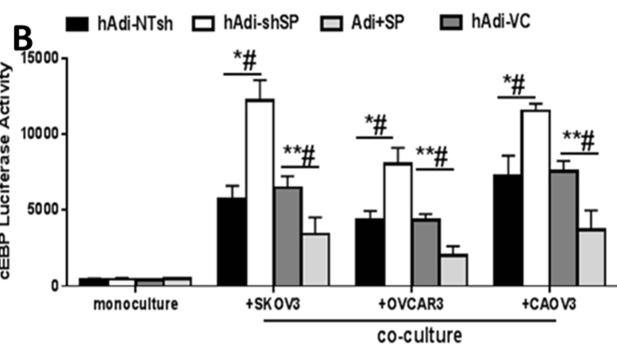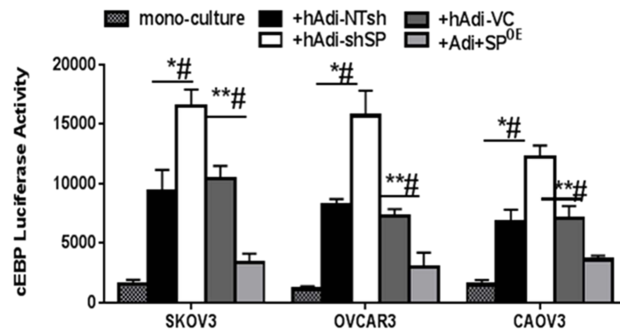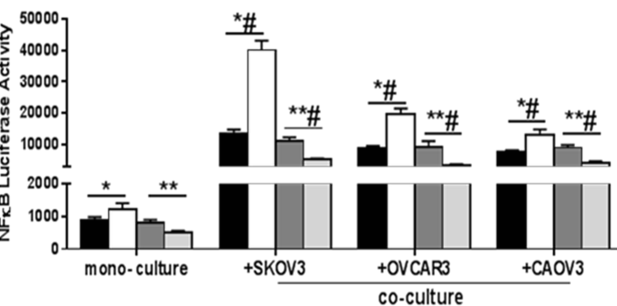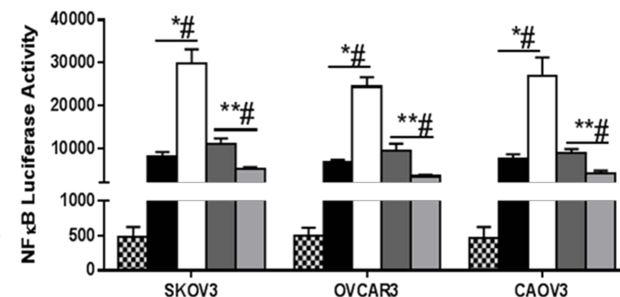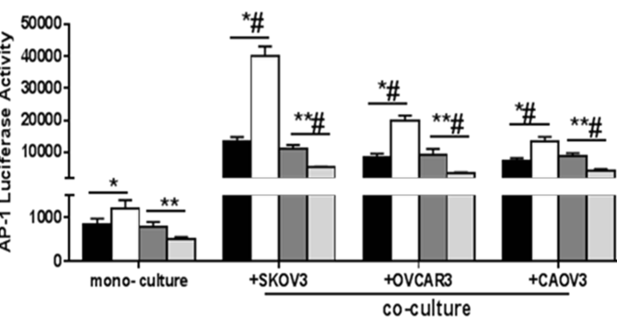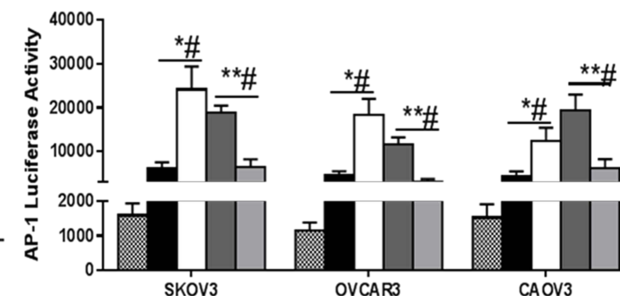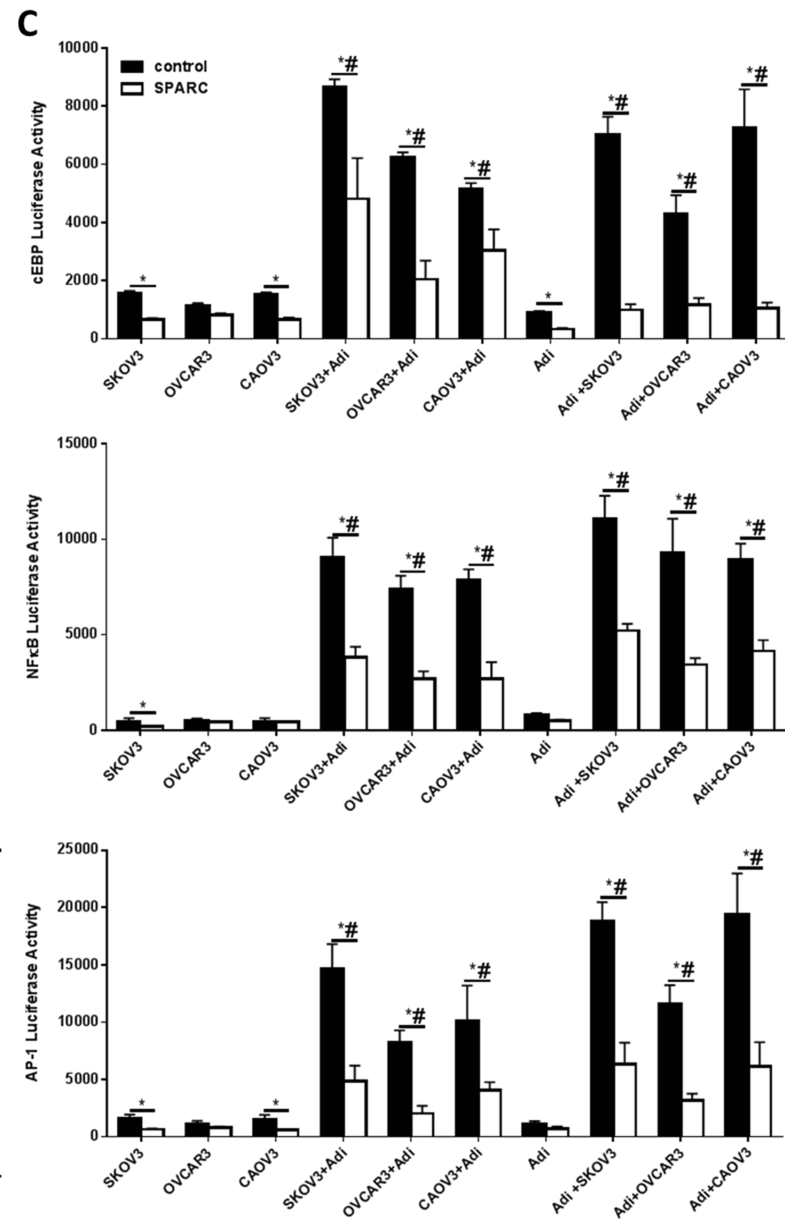

# Supplement Figure 4

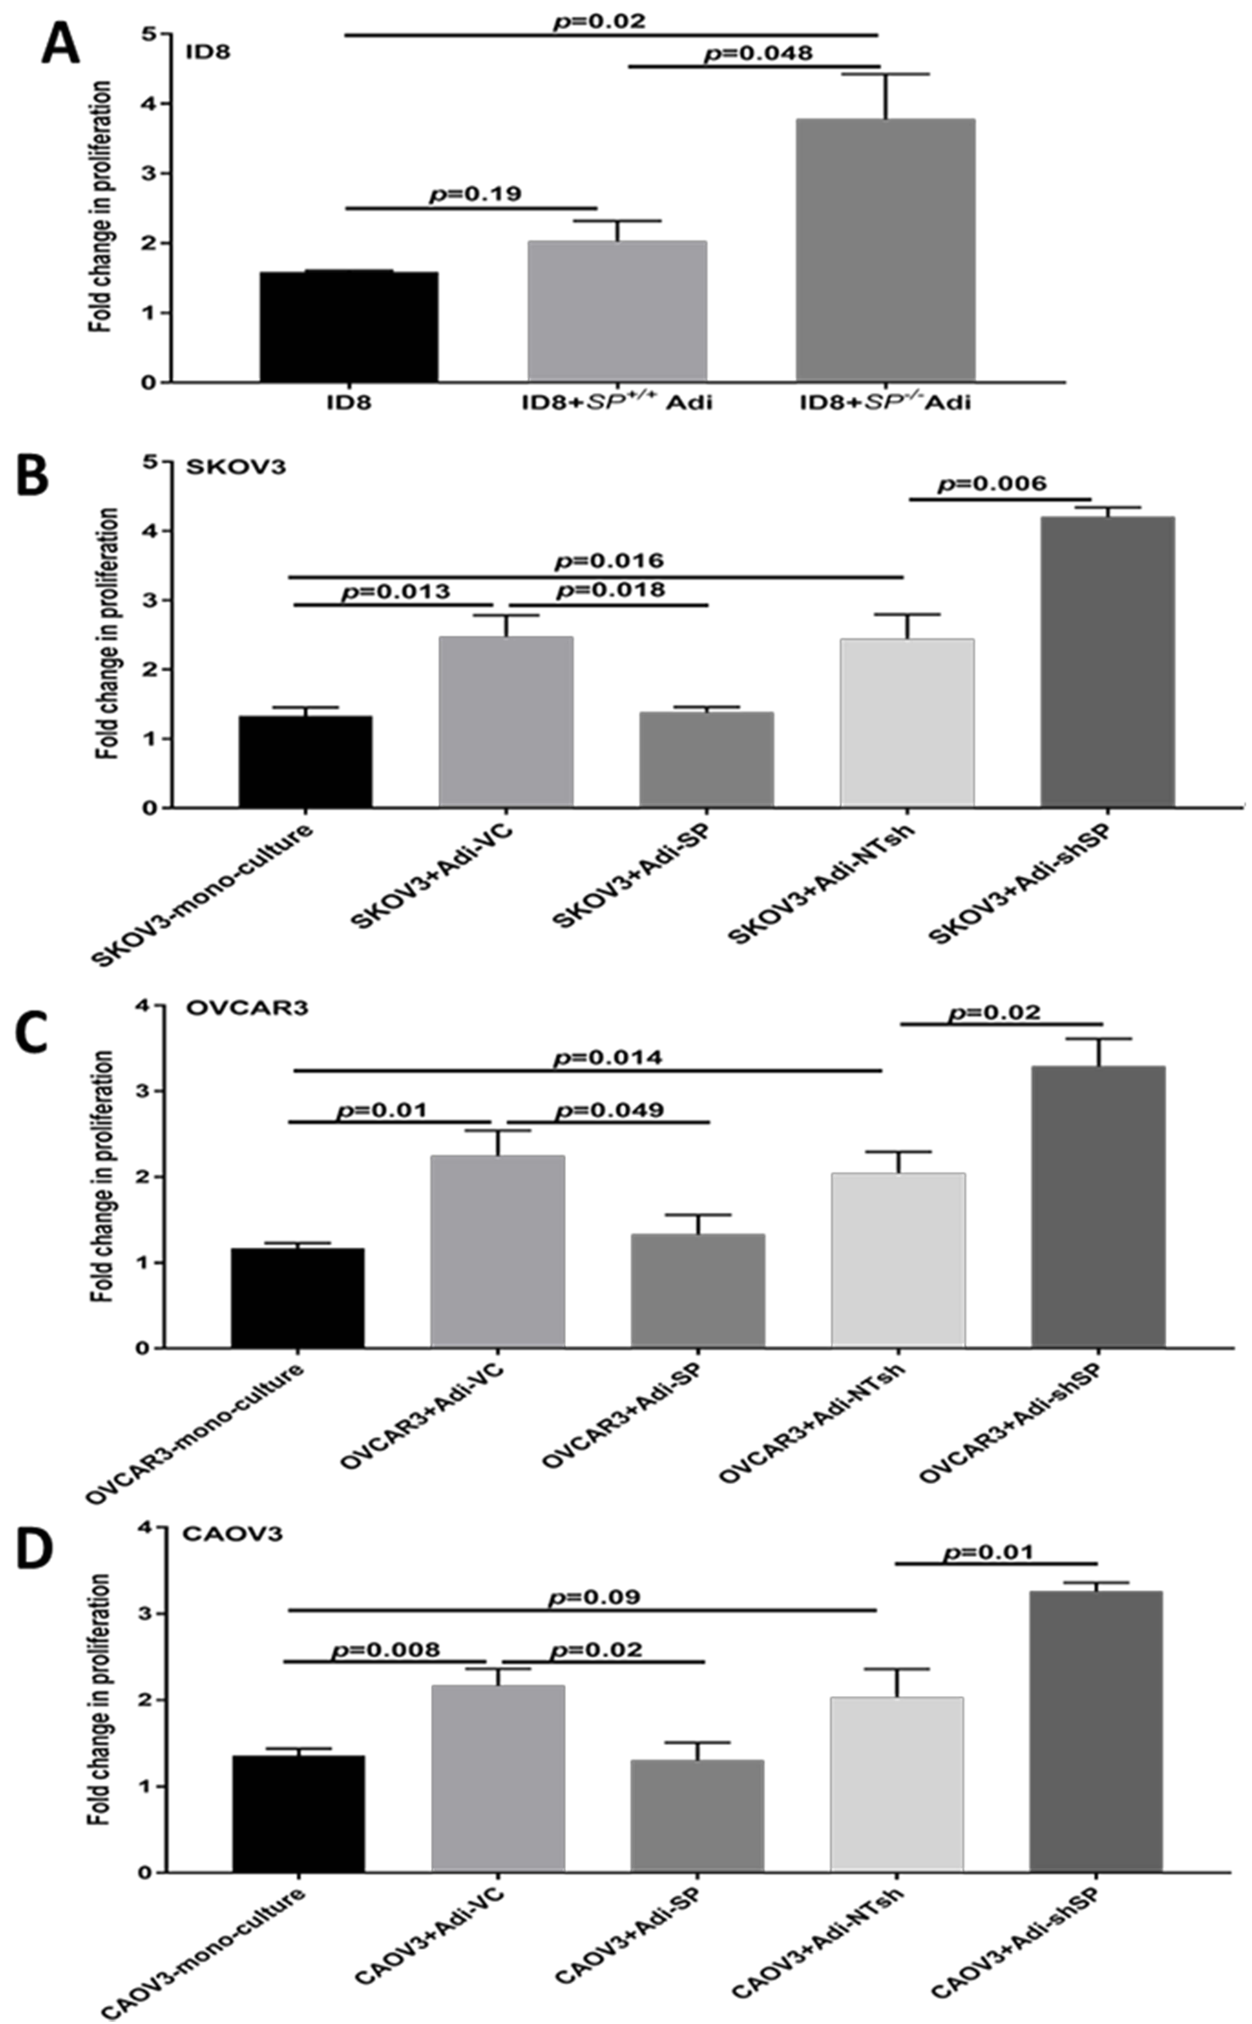

# Supplement Figure 5

## A

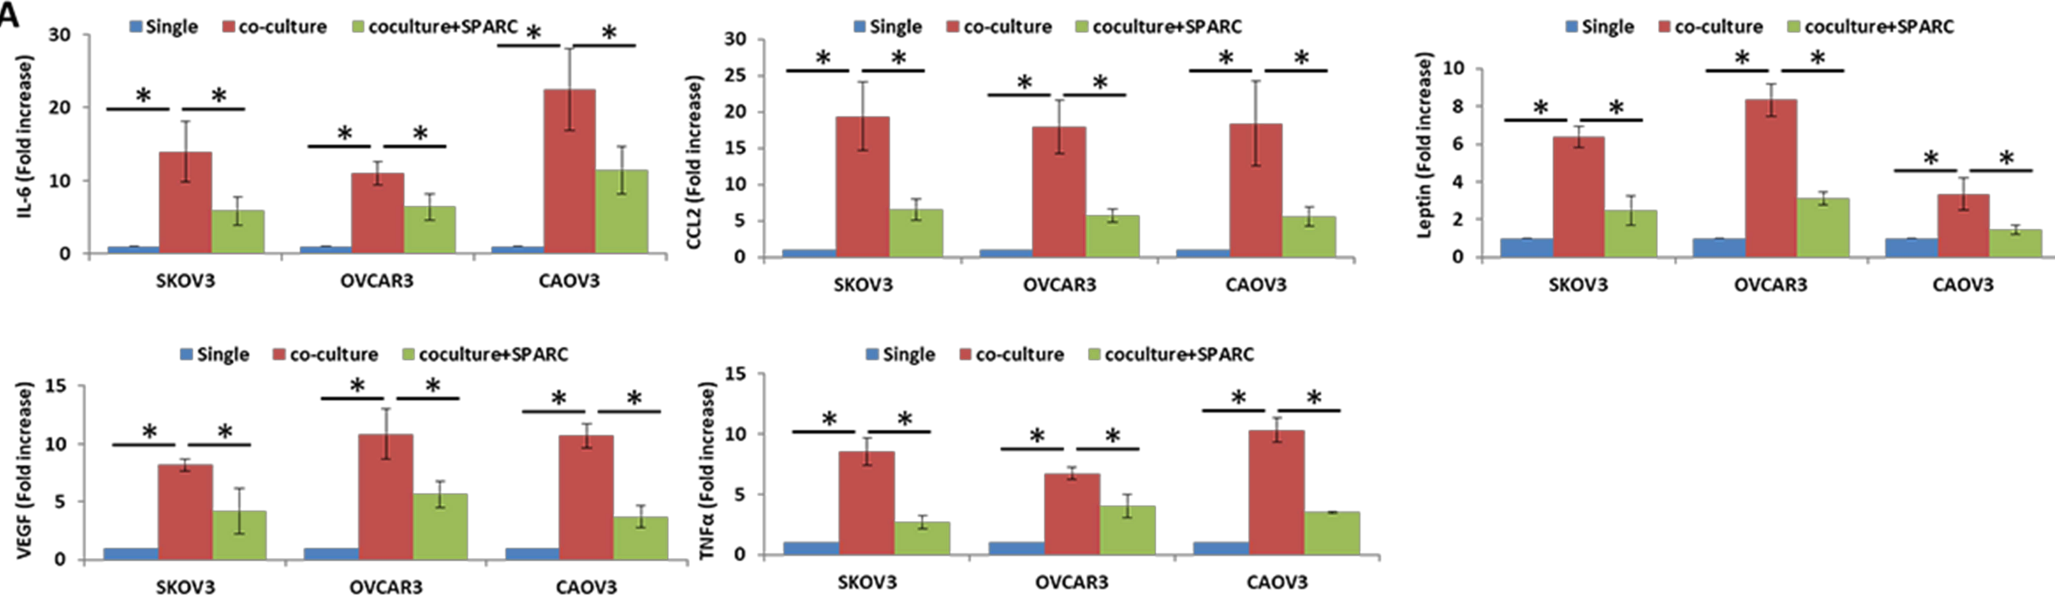

## B

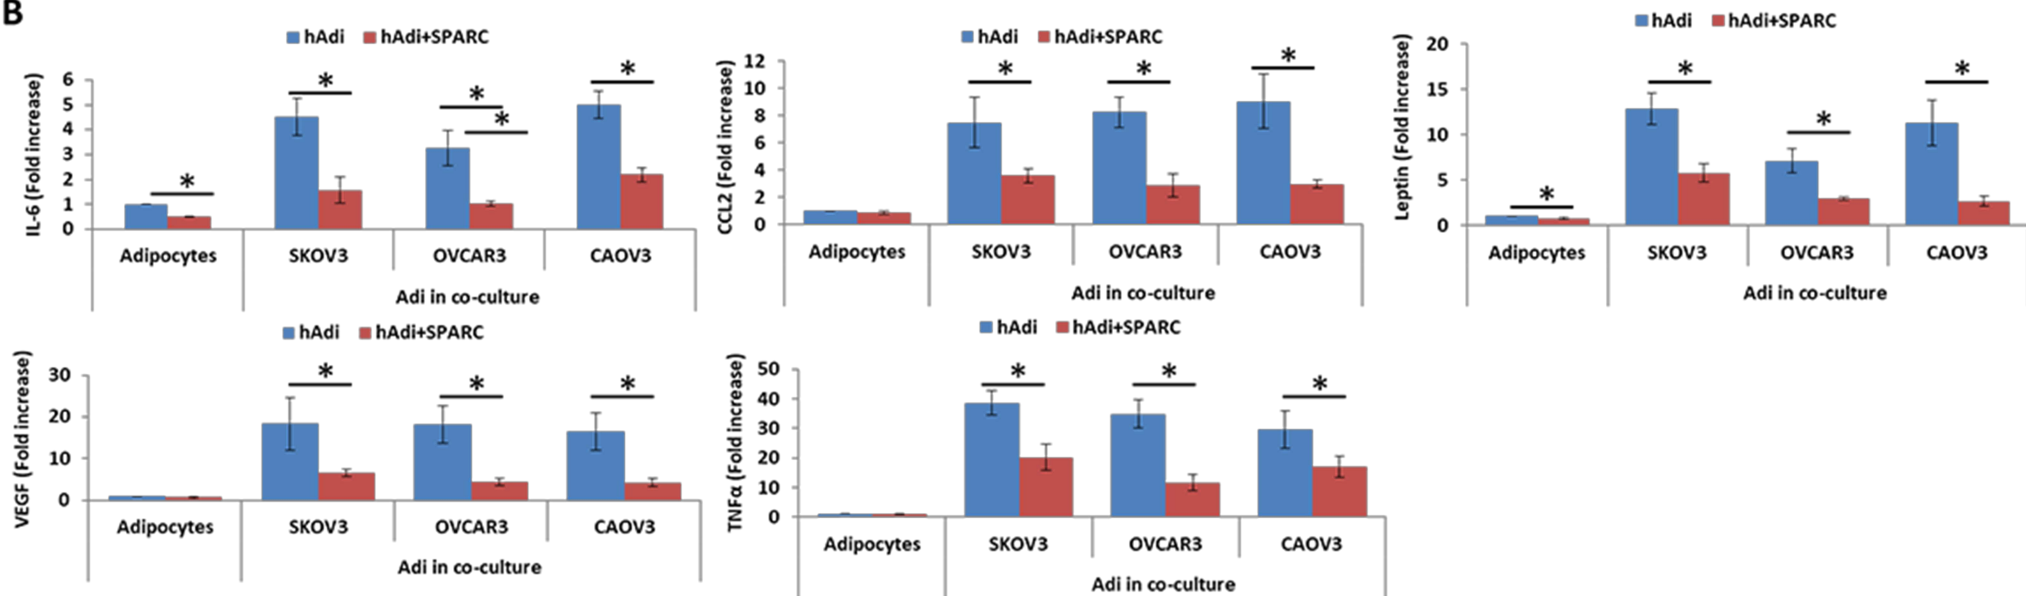

# Supplement Figure 6

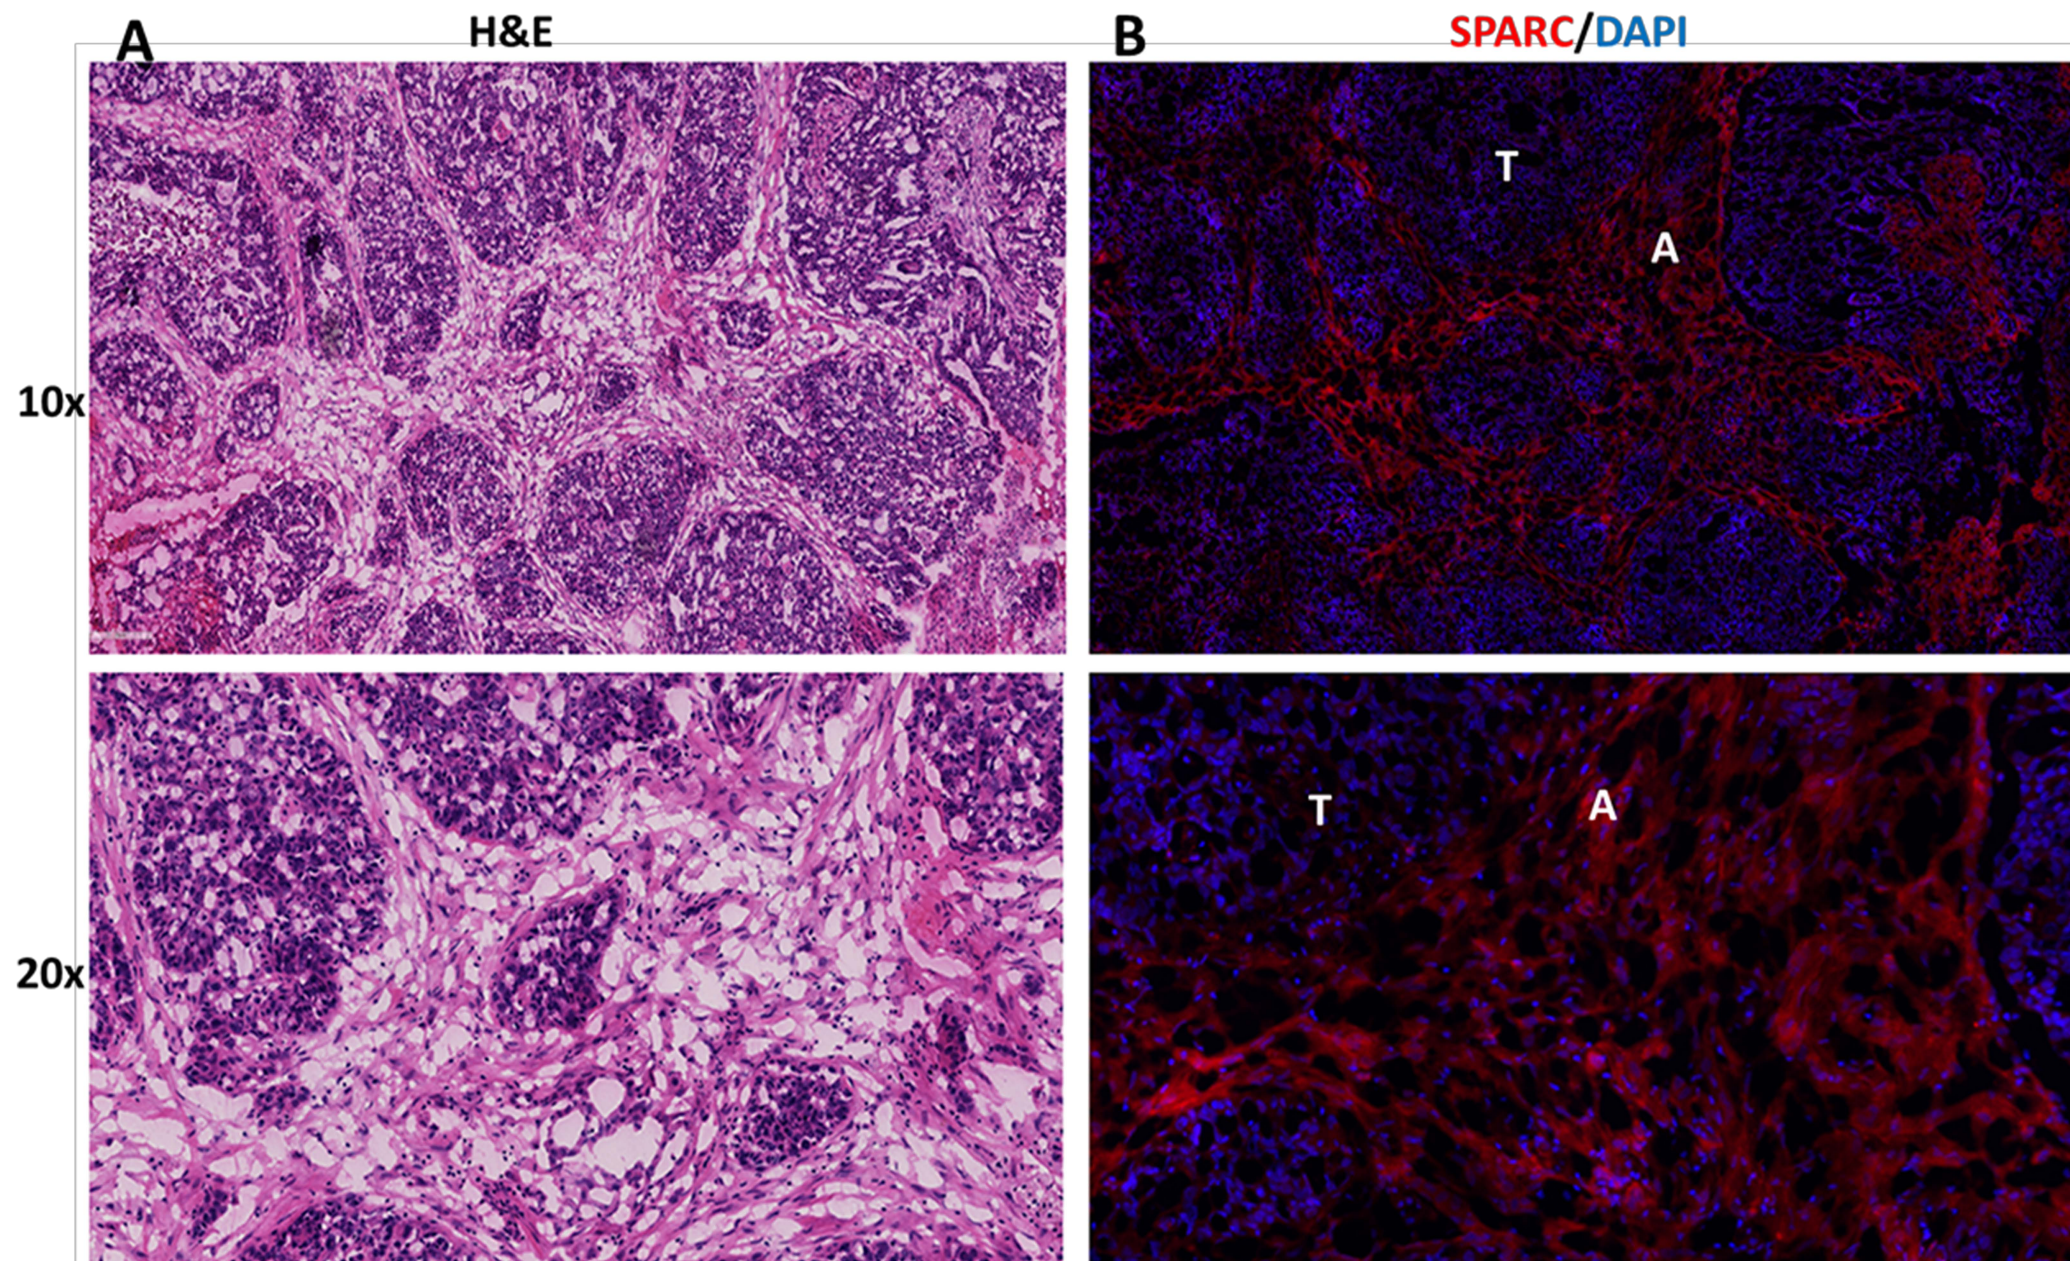

# Supplement Figure 7

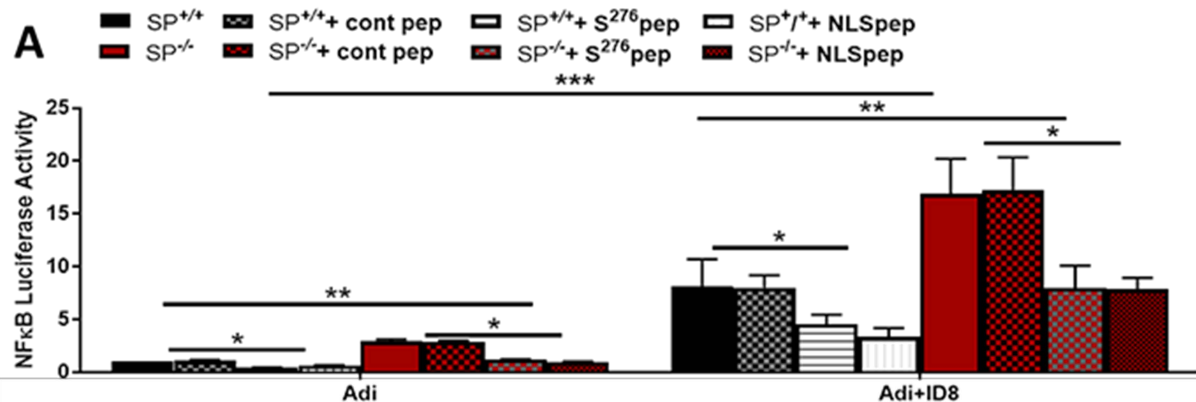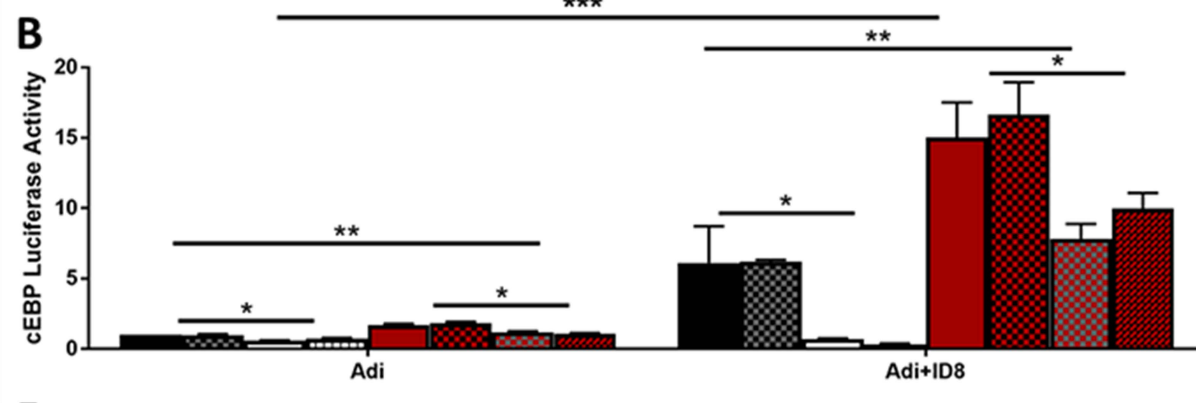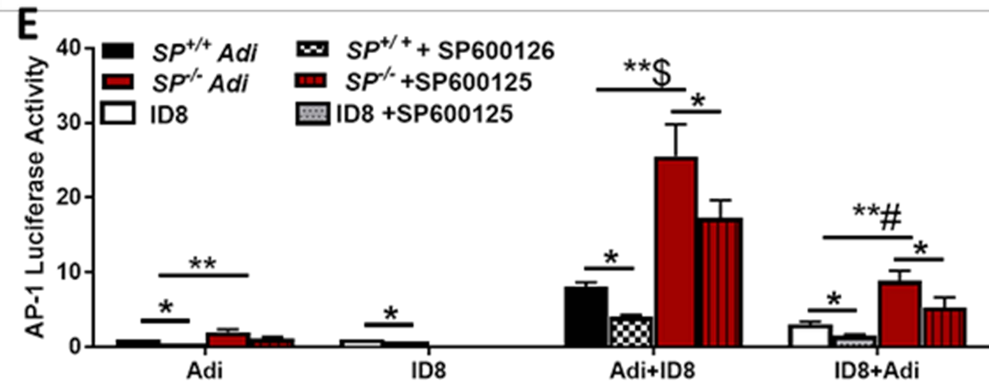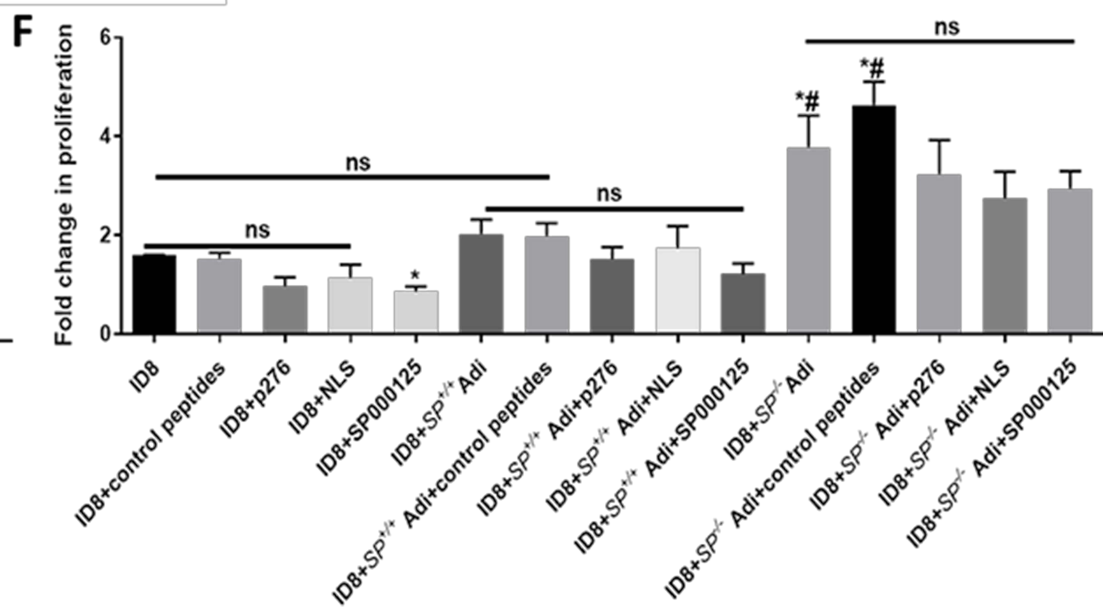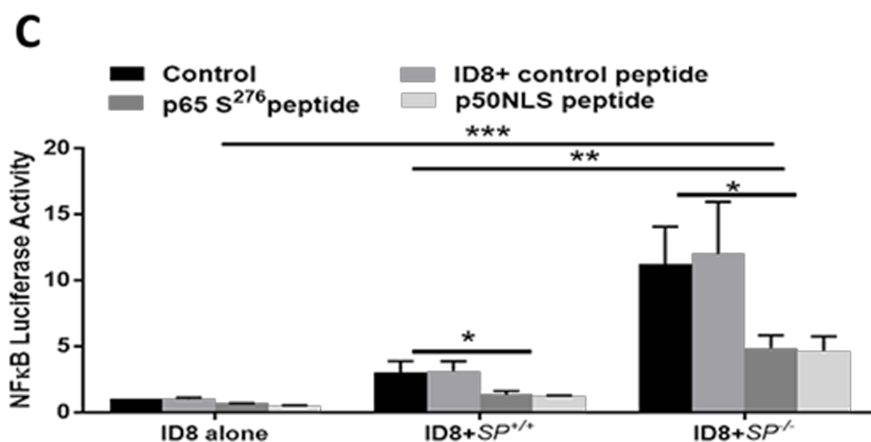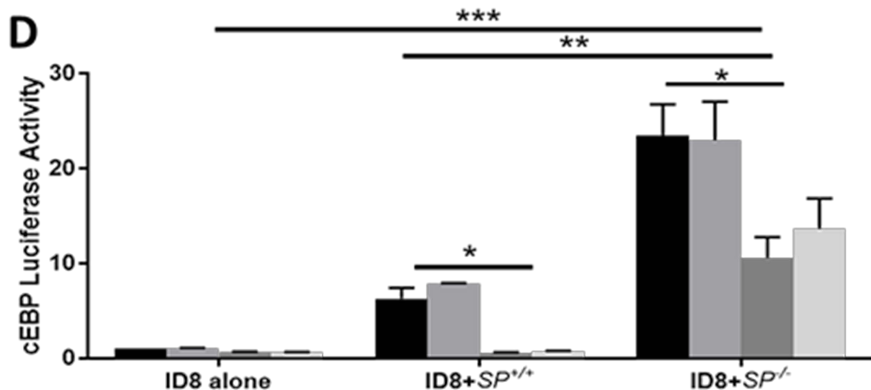

Supplement Figure 8:

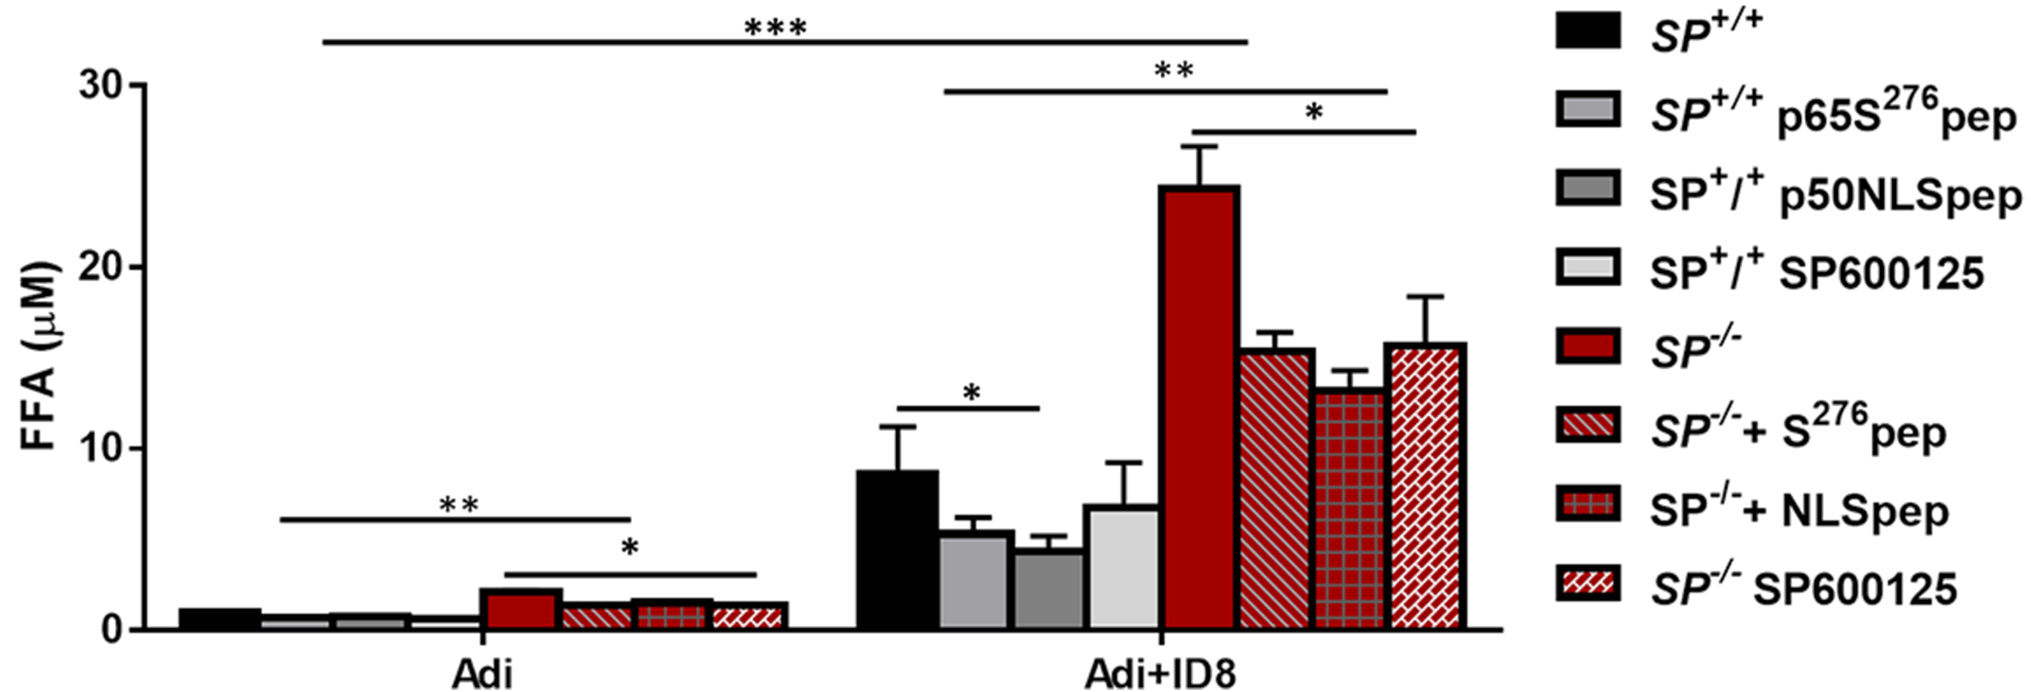



# Supplement Figure 9:

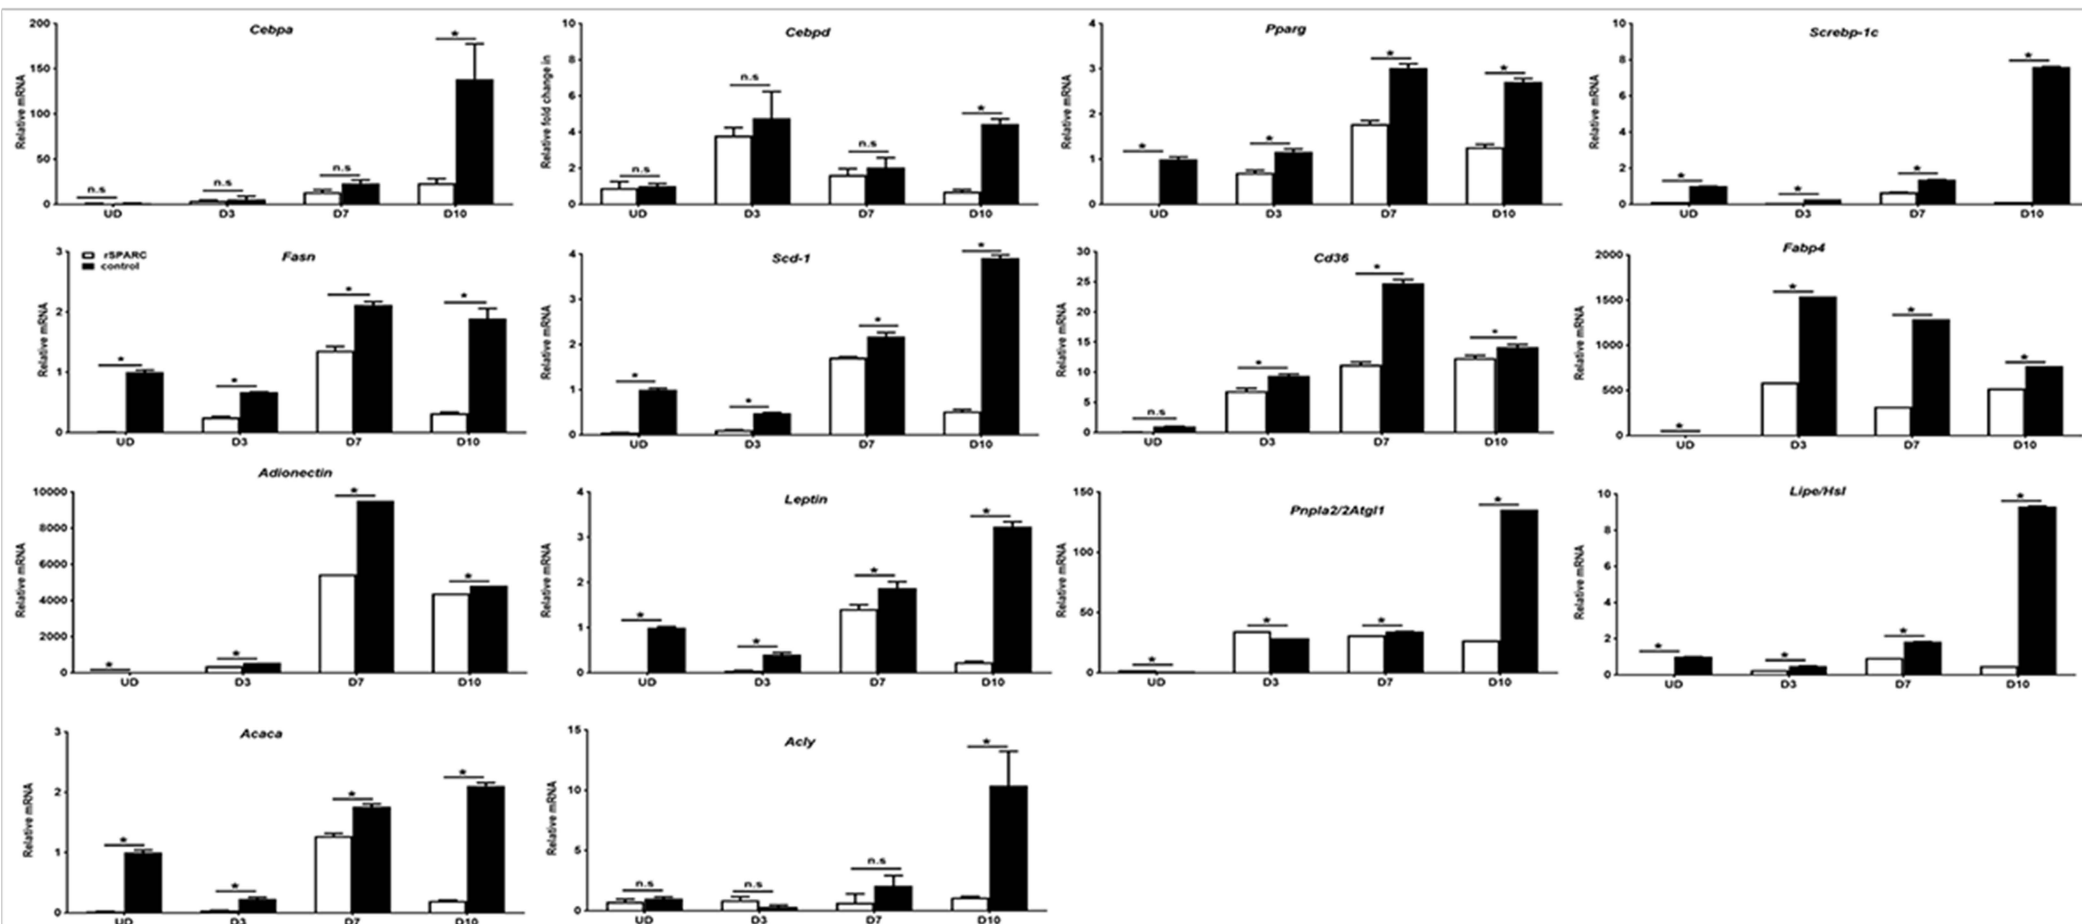

# Supplement Figure 10:

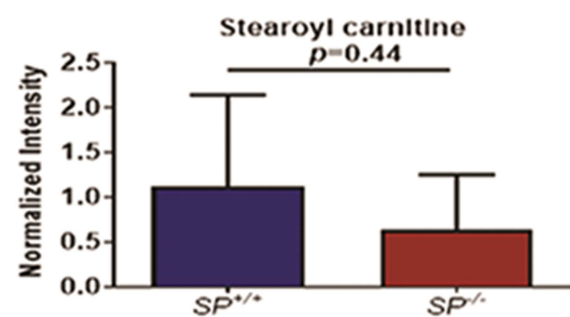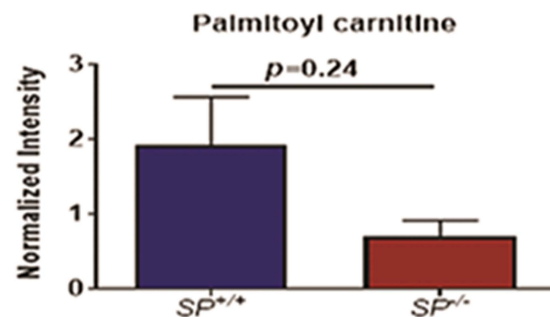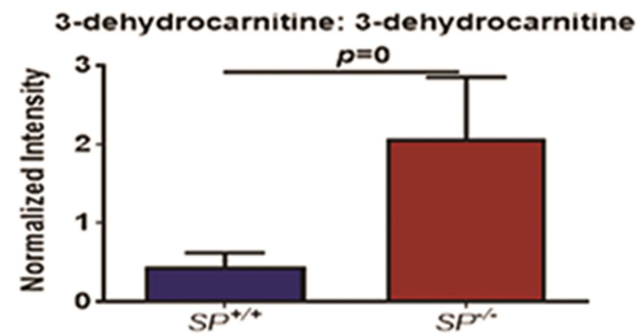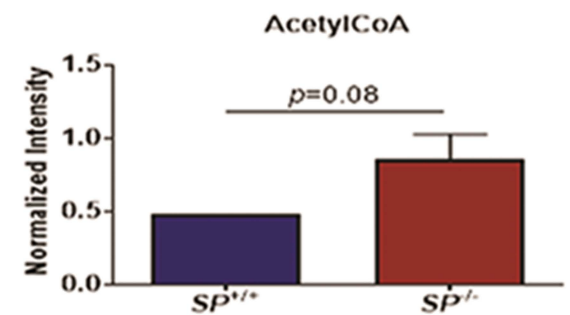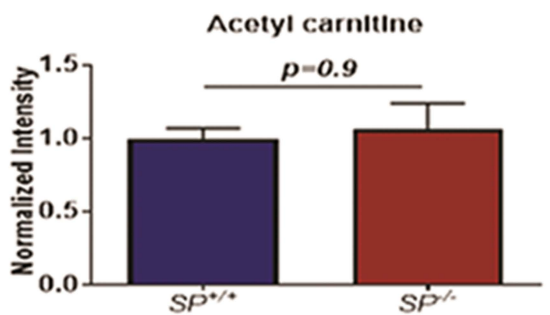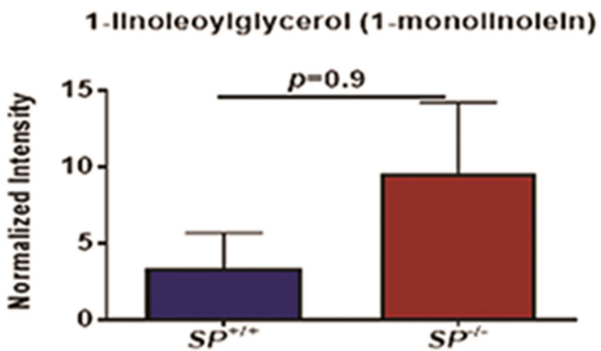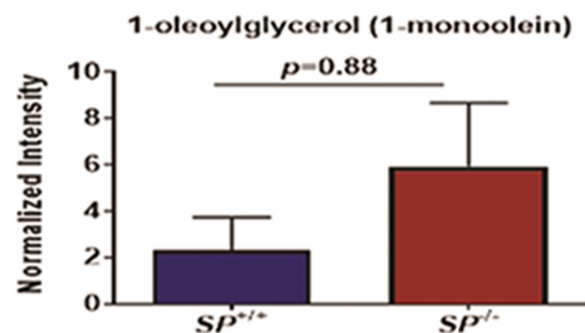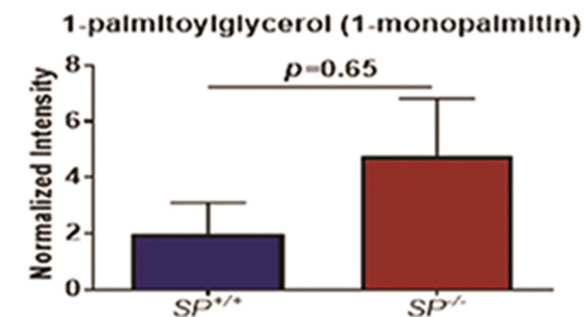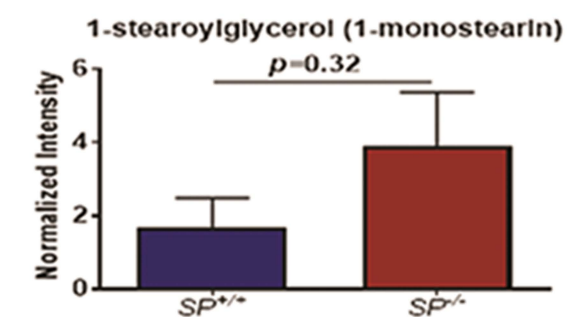

# Supplement Figure 11:

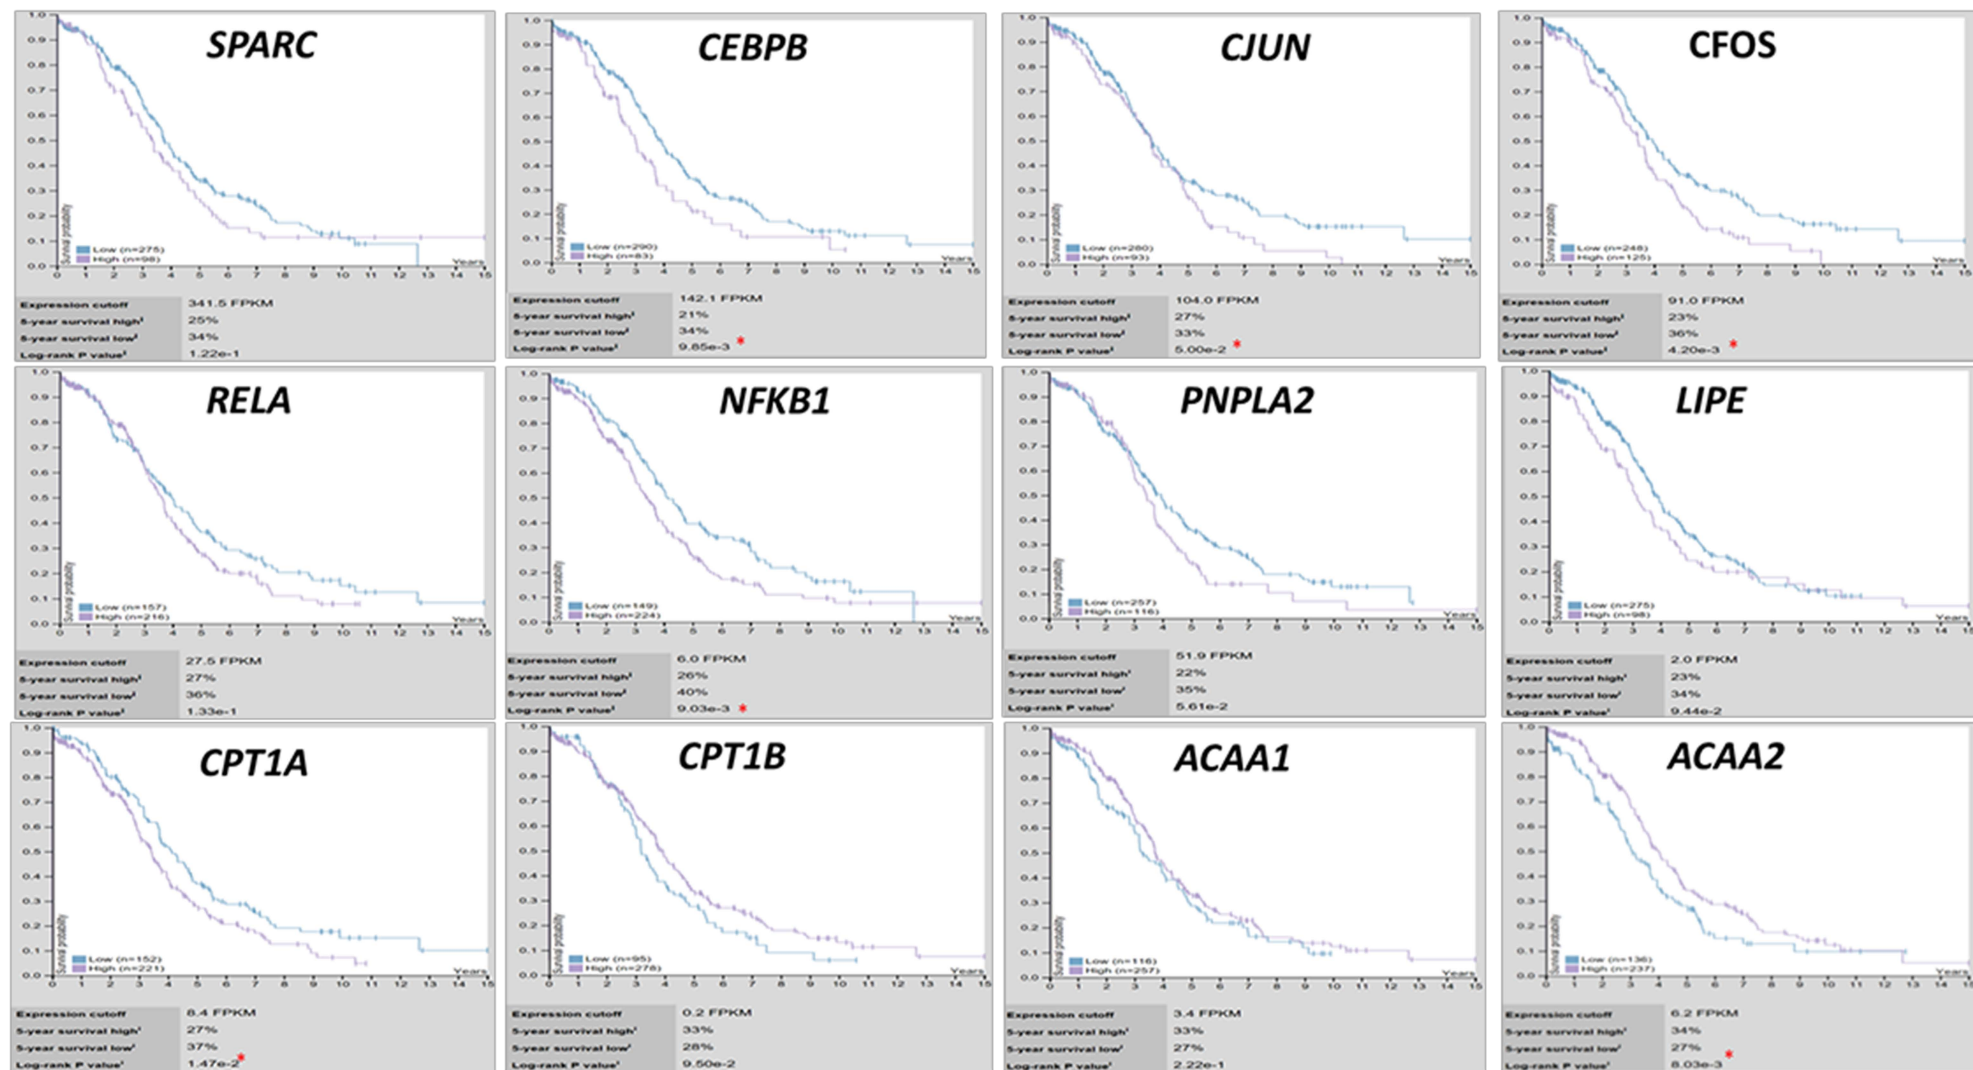

**Supplement Figure 1: Patients' data of tumor tissue specimens.**

**A. WF-TTPSR (High Grade Serous):**

|                   | <b>pT1+pT2</b> | <b>pT3+</b>   |
|-------------------|----------------|---------------|
| <b>Number</b>     | 6              | 29            |
| <b>Age</b>        | 61.5 ± 4.66    | 65.17 ± 2.113 |
| <b>Grade</b>      |                |               |
| <b>G1+G2</b>      | 1              | 1             |
| <b>HG (G3+G4)</b> | 5              | 28            |

**B. CHTN (serous papillary and poorly differentiated):**

|                   | <b>pT1+pT2</b> | <b>pT3+</b>  |
|-------------------|----------------|--------------|
| <b>Number</b>     | 10             | 30           |
| <b>Age</b>        | 65.7 ± 5.916   | 63.2 ± 2.288 |
| <b>Grade:</b>     |                |              |
| <b>G1+G2</b>      | 5              | 15           |
| <b>HG (G3+G4)</b> | 5              | 15           |

**Supplement Table 2: Antibodies**

| <b>Primary and secondary Antibodies</b>                                     | <b>Catalog #</b>                                                         | <b>Dilution</b>                                 | <b>Molecular weight</b>    |
|-----------------------------------------------------------------------------|--------------------------------------------------------------------------|-------------------------------------------------|----------------------------|
| Rabbit Anti- SPARC (CST)                                                    | 8725                                                                     | 1:250 (40 ug) WB<br>1:100 IHC (Paraffin and IF) | 43 kDa                     |
| Mouse Anti-SPARC (Abnova) MAB0278                                           | MAB0278                                                                  | 1:500 WB<br>1:100 IHC (Paraffin and IF)         | 43 kDa                     |
| Rabbit Anti- FABP4 (CST)<br>Fatty acid binding protein                      | 3544                                                                     | 1:1500 (25 ug) WB<br>1:200 IF                   | 15 kDa                     |
| Rabbit Anti-CD36 (CST)                                                      | 14347                                                                    | 1:200 IF                                        |                            |
| Rabbit Anti- CEBP Alpha (CST)<br>CCAAT/enhancer-binding proteins            | 8178                                                                     | 1: 1500 (25 ug) WB                              | 42 kDa                     |
| Rabbit Anti- CEBP Beta (CST)<br>CCAAT/enhancer-binding proteins             | 3084                                                                     | 1: 500 (25 ug)<br>1:200 IHC (Paraffin and IF)   | 38, 41 kDa                 |
| Rabbit Anti- PPAR Gamma (CST)<br>Peroxisome proliferator-activated receptor | 2435                                                                     | 1: 250 (25 ug)                                  | 53, 57 kDa                 |
| Rabbit Anti- HSL<br>(Hormone Sensitive Lipase)<br>(CST)                     | 4139                                                                     | 1:3000 (25 ug)                                  | 81, 83 kDa                 |
| Rabbit- Anti- Phospho CEBP Thr 235 (CST)                                    | 3084                                                                     | 1:500                                           | 19 k Da LIP; 36-38 kDa LAP |
| Rabbit Anti- ATGL<br>(CST)                                                  | 2439                                                                     | 1:500                                           | 54 kDa                     |
| Mouse Anti- tubulin (Sigma)                                                 | T5168                                                                    | 1:5000                                          | 55 kDa                     |
| Anti-rabbit and anti-mouse HRP-conjugated antibodies<br>(ThermoFisher)      | Cat # 31460<br>Cat # 31430                                               | 1:2000 (WB)<br>1:400 (IHC-P)                    |                            |
| NIR680 and 800 anti-mouse and anti-rabbit secondary antibodies<br>(Licor)   | [P/N 925-32210]<br>[P/N 925-32211]<br>[P/N 925-68020]<br>[P/N 925-68021] | 1:10000 (WB)                                    |                            |
| Alexa-fluor 488 anti-rabbit antibodies. (Invitrogen)                        | Cat # A-11034                                                            | 1:400 (IF)                                      |                            |
| Alexa-fluor 594 anti-rabbit antibodies. (Invitrogen)                        | Cat # A-11032                                                            | 1:400 (IF)                                      |                            |

**Supplementary Table 3: List of human primers used for real-time PCR**

| <b>Gene</b>   | <b>Forward Primer sequence [5'-3']<br/>Oligo</b> | <b>Reverse Primer sequence [5'-3'] Oligo</b> |
|---------------|--------------------------------------------------|----------------------------------------------|
| GAPDH         | AGGGCTGCTTTTAACTCTGGT                            | CCCCACTTGATTTTGGAGGGA                        |
| <i>IL6</i>    | GGTACATCCTCGACGGCATCT                            | GTCCCTCTTTGCTGCTTTCAC                        |
| <i>CCL2</i>   | CAGCCAGATGCAATCAATGC                             | GCACTGAGATCTTCCTATTGGTGAA                    |
| <i>VEGFA</i>  | CTACCTCCACCATGCCAAGT                             | GCAGTAGCTGCGCTGATAGA                         |
| <i>TNFA</i>   | GGAGAAGGGTGACCGACTCA                             | CTGCCCAGACTCGGCAA                            |
| <i>Leptin</i> | GAAGACCACATCCACACACG                             | AGCTCAGCCAGACCCATCTA                         |

**Supplementary Table 4: List of mouse primers used for real-time PCR**

| <b>Gene</b>        | <b>Forward Primer sequence [5'-3']<br/>Oligo</b> | <b>Reverse Primer sequence [5'-3'] Oligo</b> |
|--------------------|--------------------------------------------------|----------------------------------------------|
| <i>18S rRNA</i>    | GTAACCCGTTGAACCCCAT                              | CCATCCAATCGGTAGTAGCG                         |
| <i>Cd36</i>        | CCTTAAAGGAATCCCCGTGT                             | TGCATTTGCCAATGTCTAGC                         |
| <i>Gapdh</i>       | CATTGTGGAAGGGCTCATGA                             | TCTTCTGGGTGGCAGTGATG                         |
| <i>Il-6</i>        | AAAGAGTTGTGCAATGGCAATTCT                         | AAGTGCATCATCGTTGTTCATACA                     |
| <i>Ccl2</i>        | GTTGGCTCAGCCAGATGCA                              | AGCCTACTCATTGGGATCATCTTG                     |
| <i>Vegfa</i>       | CCTCCTCAGGGTTTCGGGAACCA                          | ACCCAAAGTGCTCCTCGAAGGATC                     |
| <i>Tnfa</i>        | CATCTTCTCAA AATTCGAGTGACAA                       | TGGGAGTAGACAAGGTACAACCC                      |
| <i>Fabp4</i>       | AAGGTGAAGAGCATCATAACCC                           | TCACGCCTTTCATAACACATTCC                      |
| <i>Pparg</i>       | GGAAGACCACTCGCATTCCCTT                           | GTAATCAGCAACCATTGGGTCA                       |
| <i>Srebp-1c</i>    | GATCAAAGAGGAGCCAGTGC                             | TAGATGGTGGCTGCTGAGTG                         |
| <i>Fasn</i>        | AGAGATCCCGAGACGCTTCT                             | GCCTGGTAGGCATTCTGTAGT                        |
| <i>Scd1</i>        | TTCTTACACGACCACCACCA                             | CCGAAGAGGCAGGTGTAGAG                         |
| <i>Hsl/Lipe</i>    | TCTATGCGCAGGAGTGTGTC                             | TTGACATCAGAGGGTGTGGA                         |
| <i>Atgl</i>        | CAACGCCACTCACATCTACGG                            | TCACCAGGTTGAAGGAGGGAT                        |
| <i>Acaca</i>       | CTCCAGGACAGCACAGATCA                             | GCCGAAACATCTCTGGGATA                         |
| <i>Leptin</i>      | CTCATGCCAGCACTCAAAAA                             | AGCACCACAAAACCTGATCC                         |
| <i>Adiponectin</i> | AGACCTGGCCACTTTCTCCT                             | ATCCAACCTGCACAAGTTCC                         |
| <i>Cebpa</i>       | CAAGAACAGCAACGAGTACCG                            | GTCACTGGTCAACTCCAGCAC                        |
| <i>Cebpb</i>       | ATCGACTTCAGCCCCTACCT                             | GGCTCACGTAACCGTAGTCG                         |
| <i>Cebpd</i>       | CGACTTCAGCGCCTACATTGA                            | GAAGAGGTCGGCGAAGAGTT                         |
| <i>Acly</i>        | CAGCCAAGGCAATTTAGAGC                             | CTCGACGTTTGATTA ACTGGTCT                     |
| <i>Acat1</i>       | CTGGGCGCAGGTTTACCTAT                             | GGTGTGCTCCTCTGCTCAT                          |
| <i>Acat2</i>       | ATTGTTGAAAGGTGGGCAGC                             | GGTAACATCCCATCCCGTCA                         |
| <i>Hadh</i>        | TCGTGAACCGACTCTTGGTG                             | TCTTCCTTAGACGCATCGCC                         |
| <i>Crot</i>        | ATTGGCTGGAAGAGTGGTGG                             | GAGTCCCTTCCTTTGGAGGC                         |
| <i>Acaa2</i>       | GGGGCCTTCTCAAGGACTTC                             | ACATTGCCACGATGACACT                          |
| <i>Acaa1</i>       | AGGCCCTCTAAAGACCCCAT                             | GGTGGGTCCTACCTACTCGT                         |
| <i>Cpt1a</i>       | GGA CTCCGCTCGCTCATT                              | GAGATCGATGCCATCAGGGG                         |
| <i>Cpt1b</i>       | CCTGGGATGCGTGTAGTGTT                             | CCTGGGATGCGTGTAGTGTT                         |
| <i>Slc25a20</i>    | CATGTGCCTGGTGTGTTGTGG                            | GGTGGCTGTCCAGACAAACT                         |

## Supplement Figure Legends:

**Supplement Figure 1: Isolation of primary mouse peritoneal stromal cells.** **A.** Schema of the isolation of omental adipocytes from  $SP^{-/-}$  and  $SP^{+/+}$ . **B.** Oil O red staining of freshly isolated primary adipocytes. **C.**  $\alpha$ -smooth muscle actin ( $\alpha$ -sma) staining showing fibroblastoid phenotype of omental stromal cells. **D.** Western blot showing the expression of SPARC protein in  $SP^{-/-}$  and  $SP^{+/+}$  adipocytes. **E.** Phase contrast (left), fluorescence (middle) and merged phase/fluorescent images of ID8-GFP cells showing the GFP expression levels. Scale bars, 100 $\mu$ m. **F.** Coomassie blue stained SDS-PAGE (4-20%) gel showing rhSPARC molecular weights at the indicated concentrations reconstituted in DPBS containing 0.1% BSA under reducing and non-reducing conditions. Five microliters of 0.1% BSA alongside the samples in lane 10.

**Supplement Figure 2: Homing of Ovarian Cancer cells towards normal adipocytes is mediated through secreted factors.** **A.** Bar graphs of the means  $\pm$  SEM of the levels of cytokines and chemokines secreted in CM of normal  $SP^{+/+}$  and  $SP^{-/-}$  adipocytes,  $*p < 0.05$  comparing  $SP^{+/+}$  and  $SP^{-/-}$  adipocytes, Student's  $t$ -test. **B.** Bar graphs of the means  $\pm$  SEM of the relative fluorescence intensity of ID8-GFP that homed to  $SP^{+/+}$  and  $SP^{-/-}$  *in vivo* in the presence of functional blocking antibodies to the indicated chemokines and their isotype controls.  $*p < 0.05$  comparing  $SP^{+/+}$  and  $SP^{-/-}$  within each condition;  $^{\#}p < 0.05$  compared to isotype control.  $^{\$}p < 0.05$  comparing the  $SP^{-/-}$  to the corresponding isotype control. **C.** Bar graphs of the means  $\pm$  SEM of the levels of cytokines and chemokines secreted in CM of normal  $SP^{+/+}$  and  $SP^{-/-}$  CAA.  $*p < 0.05$  comparing  $SP^{+/+}$  and  $SP^{-/-}$  adipocytes, Student's  $t$ -test. **D.** Schema of the homing/migration of ID8 cells towards normal Adi and CAA and their CM. Bars report mean  $\pm$  SEM of the fold increase in migration compared to control medium considered as 1.  $*p < 0.05$  comparing  $SP^{+/+}$  and  $SP^{-/-}$ .  $**p < 0.05$  comparing normal Adi to CAA.  $***p < 0.05$  comparing migration towards adipocytes to 72h CM.

**Supplement Figure 3: Adipocyte-SPARC inhibits co-culture-induced activation of cEBP $\beta$ , NF $\kappa$ B and AP-1 in primary human omental adipocytes and human OvCa cells A.** Schematic illustration of the experimental design of the co-cultures of OvCa cells and omental adipocytes. **B.** Primary human omental adipocytes overexpressing (hAdi-VC and hAdi-SPARC) or depleted of SPARC (hAdi-NTsh and hAdi-shSPARC) and their vector controls were transfected with luciferase reporter plasmids of cEBP $\beta$ , NF $\kappa$ B and AP-1 and were co-cultured with human OvCa cells for further 24h. The activation of each transcription factor was determined by measuring the luciferase reporter activity in each cell type. Bars represent mean



± SEM of one of three experiments performed in triplicates. \* $p < 0.05$  comparing hAdi-NTsh and hAdi-shSPARC \*\* $p < 0.05$  comparing hAdi-VC and hAdi-SPARC; and # $p < 0.05$  student's *t*-test comparing cells in single to co-cultures; comparing OvCa cells in single to co-culture with hAdi-VC and hAdi-SPARC; Student's *t*-test **C**. Treatment of mono- and co-cultures of OvCa cells and adipocytes with rSPARC (5µg/ml). The activation of each transcription factor was determined by measuring the luciferase reporter activity in each cell type. Bars represent mean ± SEM of one of three experiments performed in triplicates. \* $p < 0.05$  comparing cells with/without rSPARC; # $p < 0.05$  student's *t*-test comparing cells in single to co-cultures.

**Supplement Figure 4: The proliferation of the OvCa cell lines in mono and co-cultures with adipocytes** (under same experimental conditions of luciferase reporter assays **Figure 3C** and **Supplement Figure 3B-C**) was determined by CyQuant assay at the start of the experiments with mono- and co-cultures (0h) and at the end of the experiment (24h). Fold changes of the DNA content (proliferation) was determined for each cell type at 0 and 24h. Bars represent mean ± SEM of fold change in proliferation measured at 24h over 0h at the start of co-culture. *p* values were determined by unpaired Student's *t*-test. These fold changes were used to correct for the luciferase activity levels presented in **Figure 3C** and **Supplement Figure 3B-C**.

**Supplement Figure 5: Exogenous rSPARC suppresses co-culture-induced activation of cEBPβ, NFκB and AP-1 in primary human omental adipocytes and human OvCa cells.** **A.** the expression of the transcripts of IL-6, CCL2, Leptin, VEGF, and TNFα was determined in human OvCa cells in single and co-cultures with primary human adipocytes (hAdi) as described in **Supplement Figure 3**. Bars represent mean ± SEM of the fold changes in the transcript in ID8 cells in co-cultures compared to single cultures considered as 1 in one of three experiments performed in triplicates. **B.** Bars represent the mean ± SEM of the fold changes in the transcript levels in adipocytes in co-cultures compared to single cultures considered as 1. \* $p < 0.05$ , unpaired Student's *t*-test.

**Supplement Figure 6: A.** H&E sections of omental metastasis of HGSC specimens at indicated magnifications. **B.** Immunofluorescence showing the expression of SPARC in tumor cells (T) and adipocytes (A).

**Supplement Figure 7: Effect of blockade of NFκB, AP-1 and cEBPβ on their activity in OvCa cells and adipocyte:** Treatment of ID8 and adipocytes in single and co-cultures with NFκB cell permeable peptides S276 pep and NLS pep inhibited NFκB and cEBP luciferase

reporters in adipocytes **A-B**, and ID8 cells, **C-D**. \* $p < 0.05$  between controls and inhibitor treatments, \*\* $p < 0.05$  comparing  $SP^{+/+}$  and  $SP^{-/-}$  adipocytes. \*\*\* $p < 0.05$  comparing cells in mono- and co-cultures. **E**. Treatment of ID8 and adipocytes in single and co-cultures with JNK inhibitor SP600125 inhibited co-culture induced AP-1 luciferase reporter in both cell types. \* $p < 0.05$  comparing controls with inhibitor treatments. Bars represent mean  $\pm$  SEM of one of 2 experiments each performed in quadruplicates. \*\* $p < 0.05$  comparing  $SP^{+/+}$  and  $SP^{-/-}$  adipocytes. § $p < 0.05$  comparing adipocytes in mono- and co-cultures with ID8 cells, # $p < 0.05$  comparing ID8 in mono can co-cultures with adipocytes; unpaired Student's *t*-test. **F**. The proliferation of the ID8 cells in mono and co-cultures with  $SP^{+/+}$  and  $SP^{-/-}$  adipocytes (under same experimental conditions of luciferase reporter assays in **A-E** was determined by CyQuant assay at the start of the experiments with mono- and co-cultures (0h) and at the end of the experiment (24h). Fold changes of the DNA content (proliferation) was determined for each cell type at 0 and 24h. Bars represent mean  $\pm$  SEM of fold change in proliferation measured at 24h over 0h at the start of co-culture. \* $p < 0.05$  compared to control ID8 cells in mono-cultures. # $p < 0.05$ , comparing ID8 cells in coculture with  $SP^{+/+}$  and  $SP^{-/-}$  adipocytes, unpaired Student's *t*-test. These fold changes were used to correct for the luciferase activity levels presented in **A-E**.

**Supplement Figure 8:** Inhibition of NF $\kappa$ B (S276 and NLS peptides) and AP-1 (JNK inhibitor, SP6000125) inhibited co-culture-induced FFA release from adipocytes in mono and co-cultures with ID8 cells. Bars represent means  $\pm$  SEM fluorescent intensity of the released of FFA from a representative of 3 independent experiments each preformed in quadruplicates. \* $p < 0.05$  comparing controls with inhibitor treatments, \*\* $p < 0.05$  comparing  $SP^{+/+}$  and  $SP^{-/-}$  adipocytes, \*\*\* $p < 0.05$  comparing mono- and co-cultures; Student's *t*-test.

**Supplement Figure 9: Effect of SPARC on adipogenic differentiation factors in 3T3L1 adipocytes.** 3T3L pre-adipocytes were stimulated to differentiate into adipocytes the presence with the appropriate media as described in "Material and Methods" in the presence or absence of 5 $\mu$ g/ml recombinant murine SPARC. mRNA was isolated at the indicated time points. Bars report means  $\pm$  SEM of the expression levels of the indicated genes of a representative of 2 experiments each performed in triplicates. \* $p < 0.05$ , Student's *t*-test.

**Supplement Figure 10:** Bars depict means  $\pm$  SEM of lipid metabolites measured in ID8 omental tumor nodules isolated 6 weeks after ip injection of ID8 in  $SP^{+/+}$  and  $SP^{-/-}$  mice (n=6/genotype).  $p < 0.05$ , Student's *t*-test.

**Supplement Figure 11:** Kaplan Meier curves curated from TCGA and Protein Atlas (<https://www.proteinatlas.org/>) showing the correlation of the expression of cEBP $\beta$ , AP-1 (cJun and cFos) and NF $\kappa$ B (RelA, and NF $\kappa$ B1) and downstream target inflammatory and metabolic genes with patients' survival. \* $p < 0.05$ .
